# Supplementary material
Source: PubMed Central journal article supplement (PMC3290749)

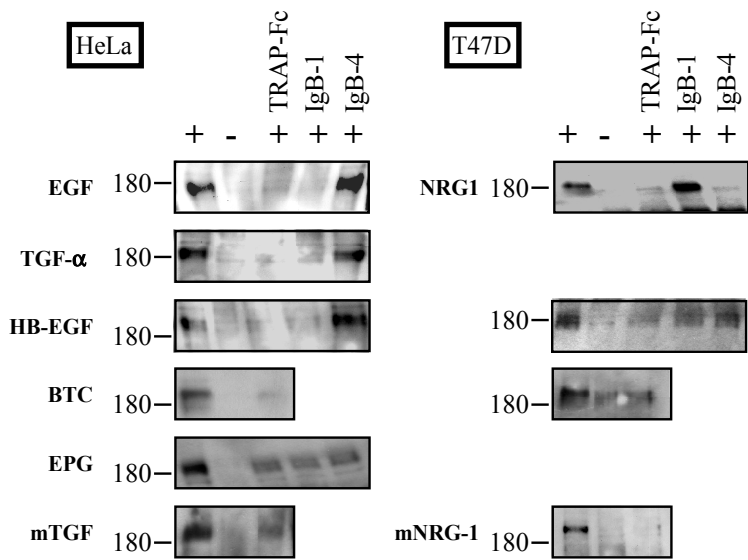

Supplement: NIHMS330254-supplement-3.pdf [file NIHMS330254-supplement-3.pdf]
